# Supplementary material
Source: ML conference proceedings conference paper supplement (https://openreview.net/forum?id=8ohamFnX14)
Supplement: supplementary_material [file attachment]

## A APPENDIX

This appendix contains the proofs of all lemmas.

*Lemma 2:* Every equivalence class in  $\mathcal{P}^\infty(\mathcal{X})$  is of the form  $\{\mu, \delta^n(\mu), \delta^{n+1} \circ \delta^n(\mu), \delta^{n+2} \circ \delta^{n+1} \circ \delta^n(\mu), \dots\}$  where  $\mu$  is a unique distribution in  $\mathcal{P}^n(\mathcal{X})$  such that  $\mu$  is not a single-atom Dirac distribution.

*Proof.* This follows directly from the definition of the equivalence relation, since for  $\mu \in \mathcal{P}^i(\mathcal{X})$  and  $\nu \in \mathcal{P}^j(\mathcal{X})$  such that there exists  $k \in \mathbb{N}$ ,  $i, j \leq k$  with  $\delta^{ik}(\mu) = \delta^{jk}(\nu)$ , we have by definition that  $\delta^{k-1} \circ \dots \circ \delta^i(\mu) = \delta^{k-1} \circ \dots \circ \delta^j(\nu)$  are single-atom Dirac distributions, and two single-atom Dirac distributions are identical if and only if they have the same atom. That is, either  $\nu = \delta^{ij}(\mu)$  if  $i \leq j$  or  $\mu = \delta^{ji}(\nu)$  if  $j \leq i$ .  $\square$

*Lemma 3:* Suppose that  $\mathcal{X}$  is a compact T1 space<sup>9</sup> consisting of at least two distinct points. Then  $\mathcal{P}^\infty(\mathcal{X})$  is non-compact with respect to the final topology.

*Proof.* For each  $n \geq 1$ , fix some  $\mu_n \in \mathcal{P}^n(\mathcal{X})$  such that  $\mu_n$  is not a single-atom Dirac distribution. Let  $P = \{[\mu_n]\}_{n \geq 1}$  be the subset of equivalence classes of these distributions in  $\mathcal{P}^\infty(\mathcal{X})$ . Then for any subset  $Q \subseteq P$  and any  $n \geq 1$ ,  $(\Delta^n)^{-1}(Q) \cap \mathcal{P}^n(\mathcal{X})$  consists of at most one point. Because  $\mathcal{X}$  is T1, each  $\mathcal{P}^m(\mathcal{X})$ ,  $m \in \mathbb{N}$  is T1, hence  $(\Delta^n)^{-1}(Q) \cap \mathcal{P}^n(\mathcal{X})$  is closed. Therefore, since  $\mathcal{P}^\infty(\mathcal{X})$  is the colimit of the sequence of  $\mathcal{P}^n(\mathcal{X})$  spaces, every subset of  $P$  is closed. Therefore,  $\mathcal{P}^\infty(\mathcal{X})$  cannot be compact.  $\square$

*Lemma 5:* If  $\mathcal{X}$  is Hausdorff, then so is  $\mathcal{P}(\mathcal{X})$ .

*Proof.* Suppose that  $\mu, \nu \in \mathcal{P}(\mathcal{X})$  such that  $\mu \neq \nu$ . Then there exists some Borel set  $E \subseteq \mathcal{X}$  such that  $\mu(E) \neq \nu(E)$ . Without loss of generality, suppose  $\mu(E) < \nu(E)$ . Let  $a \in \mathbb{R}$  such that  $\mu(E) < a < \nu(E)$ . Consider the characteristic function of  $E$ ,  $\mathbf{1}_E$ , defined as  $\mathbf{1}_E(x) = 1$  if  $x \in E$  and  $\mathbf{1}_E(x) = 0$  otherwise. Then observe that the following two sets are disjoint open sets with respect to the weak topology on  $\mathcal{P}(\mathcal{X})$ :

1.  $E_{<a} := \{\eta \in \mathcal{P}(\mathcal{X}) \mid \eta(E) < a\}$
2.  $E_{>a} := \{\eta \in \mathcal{P}(\mathcal{X}) \mid \eta(E) > a\}$

Then  $\mu \in E_{<a}$  and  $\nu \in E_{>a}$  and  $E_{<a} \cap E_{>a} = \emptyset$ .  $\square$

*Lemma 6:*  $W_p^\infty$  is a metric on  $\mathcal{P}_p^\infty(\mathcal{X})$

*Proof.* Let  $\mu \in \mathcal{P}_p^m(\mathcal{X})$  and  $\nu \in \mathcal{P}_p^n(\mathcal{X})$  with  $m \geq n$  such that  $\mu$  and  $\nu$  are not single-atom Dirac distributions (so they could be either different distributions or points in  $\mathcal{X}$ ). By definition,  $W_p^\infty([\mu], [\nu]) = W_p^m(\mu, \nu_m)$ , where  $\nu_m$  is the unique element in the intersection  $[\nu] \cap \mathcal{P}_p^m$ . Then because  $W_p^m$  is a metric,  $W_p^m(\mu, \nu_m) \geq 0$  with  $W_p^m(\mu, \nu_m) = 0$  if and only if  $\mu = \nu_m$ . However, if  $\mu = \nu_m$ , then because we have chosen  $m$  so that  $\mu$  is not a single-atom Dirac distribution,  $\nu_m$  is not a single-atom Dirac distribution. Therefore since  $\nu_m \in [\nu]$  and  $[\nu]$  is the unique non-single-atom Dirac distribution (or point in  $\mathcal{X}$ ) in  $[\nu]$ , we have  $\mu = \nu_m = \nu$ . Similarly,  $W_p^\infty([\mu], [\nu]) = W_p^\infty([\nu], [\mu])$  because  $W_p^n(\mu, \nu) = W_p^n(\nu, \mu)$  for every  $n \in \mathbb{N}$ . All that remains is to verify the triangle inequality. Let  $[\mu], [\nu], [\eta] \in \mathcal{P}_p^\infty(\mathcal{X})$  such that  $\mu \in [\mu] \cap \mathcal{P}_p^{r[\mu]}(\mathcal{X})$ ,  $\nu \in [\nu] \cap \mathcal{P}_p^{r[\nu]}(\mathcal{X})$ , and  $\eta \in [\eta] \cap \mathcal{P}_p^{r[\eta]}(\mathcal{X})$ . Without loss of generality, suppose that  $r_{[\mu]} \leq r_{[\eta]}$ . Then we have the following three cases:

1.  $r_{[\nu]} \leq r_{[\mu]} \leq r_{[\eta]}$ : In this case, we have the following:
 
$$\begin{aligned} W_p^\infty([\mu], [\nu]) + W_p^\infty([\nu], [\eta]) &= W_p^{r[\mu]}(\mu, \nu_{r[\mu]}) + W_p^{r[\eta]}(\nu_{r[\eta]}, \eta) \\ &= W_p^{r[\eta]}(\mu_{r[\eta]}, \nu_{r[\eta]}) + W_p^{r[\eta]}(\nu_{r[\eta]}, \eta) \geq W_p^{r[\eta]}(\mu_{r[\eta]}, \eta) = W_p^\infty([\mu], [\eta]) \end{aligned} \quad (26)$$

<sup>9</sup>This is equivalent to saying that for every  $x \in \mathcal{X}$ , the set  $\{x\}$  is a closed subset of  $\mathcal{X}$ .

2.  $r_{[\mu]} \leq r_{[\nu]} \leq r_{[\eta]}$ : In this case, we have:

$$\begin{aligned} W_p^\infty([\mu], [\nu]) + W_p^\infty([\nu], [\eta]) &= W_p^{r_{[\nu]}}(\mu_{r_{[\nu]}}, \nu) + W_p^{r_{[\eta]}}(\nu_{r_{[\eta]}}, \eta) \\ &= W_p^{r_{[\eta]}}(\mu_{r_{[\eta]}}, \nu_{r_{[\eta]}}) + W_p^{r_{[\eta]}}(\nu_{r_{[\eta]}}, \eta) \geq W_p^{r_{[\eta]}}(\mu_{r_{[\eta]}}, \eta) = W_p^\infty([\mu], [\eta]) \end{aligned} \quad (27)$$

3.  $r_{[\mu]} \leq r_{[\eta]} \leq r_{[\nu]}$ : In this case, we have:

$$\begin{aligned} W_p^\infty([\mu], [\nu]) + W_p^\infty([\nu], [\eta]) &= W_p^{r_{[\nu]}}(\mu_{r_{[\nu]}}, \nu) + W_p^{r_{[\nu]}}(\nu, \eta_{r_{[\nu]}}) \\ &\geq W_p^{r_{[\nu]}}(\mu_{r_{[\nu]}}, \eta_{r_{[\nu]}}) = W_p^\infty([\mu], [\eta]) \end{aligned} \quad (28)$$

□

*Lemma 8:* Any space  $\mathcal{X}$  may be embedded continuously in  $\mathcal{H}_{\mathcal{I}}\mathcal{P}(\mathcal{X})$  via the following map, for any  $x \in \mathcal{X}$  and  $i \in \mathcal{I}$ :

$$cd(x)(i) := \delta_x. \quad (29)$$

That is,  $cd$  is the composition of the map sending each point  $x$  to the single-atom Dirac distribution centered at  $x$  and the constant-valued map sending each point in  $\mathcal{I}$  to the aforementioned distribution.

*Proof.* Let  $E \subseteq \mathcal{H}_{\mathcal{I}}\mathcal{P}(\mathcal{X})$  open with respect to the compact-open topology. That is,  $E = \bigcup_{a \in A} \left( \bigcap_{t_a=1}^{n_a} V(K_{t_a}, U_{t_a}) \right)$  for some indexing set  $A$  (possibly uncountable), positive natural numbers  $n_a$ , compact subsets  $K_{t_a} \subseteq \mathcal{I}$ , and open subsets  $U_{t_a} \subseteq \mathcal{P}(\mathcal{X})$ . We must see if the set  $cd^{-1}(E)$  is open in  $\mathcal{X}$ .

$$\begin{aligned} cd^{-1}(E) &= \left\{ x \in \mathcal{X} \mid c_{\delta_x} \in \bigcup_{a \in A} \left( \bigcap_{t_a=1}^{n_a} V(K_{t_a}, U_{t_a}) \right) \right\} \\ &= \bigcup_{a \in A} \left\{ x \in \mathcal{X} \mid c_{\delta_x} \in \bigcap_{t_a=1}^{n_a} V(K_{t_a}, U_{t_a}) \right\} = \bigcup_{a \in A} \left\{ x \in \mathcal{X} \mid \delta_x \in \bigcap_{t_a=1}^{n_a} U_{t_a} \right\} \\ &= \bigcup_{a \in A} \delta^{-1} \left( \bigcap_{t_a=1}^{n_a} U_{t_a} \right) \end{aligned} \quad (30)$$

Note that  $\bigcap_{t_a=1}^{n_a} U_{t_a}$  is a finite intersection of open sets and hence open, so because  $\delta : \mathcal{X} \rightarrow \mathcal{P}(\mathcal{X})$  is continuous,  $\delta^{-1} \left( \bigcap_{t_a=1}^{n_a} U_{t_a} \right)$  is open, and hence so is the final set in Equation 30. □

*Lemma 9:* Suppose that  $\mathcal{X}$  is Hausdorff. Then each map  $(cd)^n$  defined above is a homeomorphism onto its image.

*Proof.* It is sufficient to show that that map  $c : \mathcal{P}(\mathcal{X}) \rightarrow \mathcal{H}_{\mathcal{I}}\mathcal{P}(\mathcal{X})$  sending each distribution in  $\mathcal{P}(\mathcal{X})$  to the constant function  $c_\mu$  with  $c_\mu(i) = \mu$  for every  $i \in \mathcal{I}$ , is a homeomorphism onto its image, because  $cd : \mathcal{X} \rightarrow \mathcal{H}_{\mathcal{I}}\mathcal{P}(\mathcal{X})$  may then be written as the product of maps which are homeomorphisms onto their images; namely,  $cd(x) = c \circ \delta(x)$ . To this end, first note that the map  $c$  is well-defined, since for each  $\mu \in \mathcal{P}(\mathcal{X})$ ,  $c_\mu$  is a continuous function. Furthermore,  $c$  is injective, since for any  $\mu, \nu \in \mathcal{P}(\mathcal{X})$ , if  $c_\mu = c_\nu$ , then for every  $i \in \mathcal{I}$ , we have that  $\mu = c_\mu(i) = c_\nu(i) = \nu$ . Clearly  $c$  is surjective onto its image. It remains to show that  $c^{-1} : c(\mathcal{P}(\mathcal{X})) \rightarrow \mathcal{P}(\mathcal{X})$  is continuous. Suppose that  $E \subseteq \mathcal{P}(\mathcal{X})$  is an open set with respect to the weak topology. We would like to show that  $c(E)$  is open with respect to the subspace topology on  $c(\mathcal{P}(\mathcal{X}))$ . Since  $\mathcal{X}$  is Hausdorff,  $\mathcal{P}(\mathcal{X})$  is Hausdorff, and there exist disjoint open neighborhoods  $N_\mu$  for each  $\mu \in E$ . Let  $K \subseteq \mathcal{I}$  be an arbitrary non-empty compact subset. Then  $\bigcup_{\mu \in E} V(K, N_\mu) \subseteq \mathcal{H}_{\mathcal{I}}\mathcal{P}(\mathcal{X})$  is open and  $c(E) = c(\mathcal{P}(\mathcal{X})) \cap \left( \bigcup_{\mu \in E} V(K, N_\mu) \right)$ , hence  $c(E)$  is open with respect to the subspace topology. Therefore  $c$  is a homeomorphism onto its image, and hence so is  $cd$ . The claim of the lemma then follows inductively by replacing  $\mathcal{X}$  with  $\mathcal{H}_{\mathcal{I}}\mathcal{P}(\mathcal{X})$ . □

*Lemma 10: The following diagram commutes:*

$$\begin{array}{ccc} \mathcal{P}(\mathcal{I}) \times \mathcal{H}_{\mathcal{I}}\mathcal{P}^n(\mathcal{X}) & \xrightarrow{id \times \delta^0} & \mathcal{P}(\mathcal{I}) \times \mathcal{P}(\mathcal{H}_{\mathcal{I}}\mathcal{P}^n(\mathcal{X})) \\ id \times (cd)^n \downarrow & & \downarrow \delta^1 \circ \pi_2 \\ \mathcal{P}(\mathcal{I}) \times \mathcal{H}_{\mathcal{I}}\mathcal{P}^{n+1}(\mathcal{X}) & \xrightarrow{push} & \mathcal{P}^2(\mathcal{H}_{\mathcal{I}}\mathcal{P}^n(\mathcal{X})) \end{array}$$

Here  $\pi_2 : \mathcal{P}(\mathcal{I}) \times \mathcal{P}(\mathcal{H}_{\mathcal{I}}\mathcal{P}^n(\mathcal{X})) \rightarrow \mathcal{P}(\mathcal{H}_{\mathcal{I}}\mathcal{P}^n(\mathcal{X}))$  is projection onto the second coordinate; i.e.  $\pi_2(\mu, \nu) = \nu$ .

*Proof.* Start with any  $(\mu, f) \in \mathcal{P}(\mathcal{I}) \times \mathcal{H}_{\mathcal{I}}\mathcal{P}^n(\mathcal{X})$ . Then we have:

$$push \circ (id \times (cd)^n)(\mu, f) = push(\mu, c_{\delta_f}) = c_{\delta_f}^*(\mu) \quad (31)$$

Note that for any measurable  $E \subseteq \mathcal{P}(\mathcal{H}_{\mathcal{I}}\mathcal{P}^n(\mathcal{X}))$ , we have that  $c_{\delta_f}^*(\mu)(E) = \mu(c_{\delta_f}^{-1}(E))$ . Since  $c_{\delta_f}$  is the constant map sending every element in  $\mathcal{I}$  to the single-atom Dirac distribution  $\delta_f$ , we have that  $c_{\delta_f}^{-1}(E) = \mathcal{I}$  if  $\delta_f \in E$  and  $c_{\delta_f}^{-1}(E) = \emptyset$  otherwise. Therefore,  $\mu(c_{\delta_f}^{-1}(E)) = 1$  if  $\delta_f \in E$  and  $\mu(c_{\delta_f}^{-1}(E)) = 0$  otherwise. That is,  $push \circ (id \times (cd)^n)(\mu, f) = \delta_{\delta_f}$ .

On the other hand, we have:

$$(\delta^1 \circ \pi_2) \circ (id \times \delta^0)(\mu, f) = \delta^1 \circ \pi_2(\mu, \delta_f) = \delta^1(\delta_f) = \delta_{\delta_f}. \quad (32)$$

□

*Lemma 11: The following diagram commutes:*

$$\begin{array}{ccc} \mathcal{I} \times \mathcal{H}_{\mathcal{I}}\mathcal{P}^n(\mathcal{X}) & \xrightarrow{\pi_2} & \mathcal{H}_{\mathcal{I}}\mathcal{P}^n(\mathcal{X}) \\ id \times (cd)^n \downarrow & & \downarrow \delta \\ \mathcal{I} \times \mathcal{H}_{\mathcal{I}}\mathcal{P}^{n+1}(\mathcal{X}) & \xrightarrow{ev} & \mathcal{P}(\mathcal{H}_{\mathcal{I}}\mathcal{P}^n(\mathcal{X})) \end{array}$$

*Proof.* This follows from Lemma 10 by taking only single-atom Dirac distributions in  $\mathcal{P}(\mathcal{I})$ ; alternatively, one can check directly that for every  $i \in \mathcal{I}$  and  $h \in \mathcal{H}_{\mathcal{I}}\mathcal{P}^n(\mathcal{X})$ , we have:

$$\delta \circ \pi_2(i, h) = \delta(h) = \delta_h = c_{\delta_h}(i) = ev(i, cd^n(h)) = ev \circ (id \times (cd)^n)(i, h). \quad (33)$$

□

*Lemma 12: The maps defined in Equation 18 are homeomorphisms onto their images.*

*Proof.* We prove the claim by induction. Clearly  $f_0$  is a homeomorphism onto its image. As well, we already know by Lemma 9 that the maps  $c : \mathcal{P}(\mathcal{H}_{\mathcal{I}}\mathcal{P}^n(\mathcal{X})) \rightarrow \mathcal{H}_{\mathcal{I}}\mathcal{P}^{n+1}(\mathcal{X})$  are homeomorphisms onto their images. Now, assume that  $f_n$  is a homeomorphism onto its image. It is well-known that the push-forward of a homeomorphism  $f : \mathcal{A} \rightarrow \mathcal{B}$  is a homeomorphism  $push(f) : \mathcal{P}(\mathcal{A}) \rightarrow \mathcal{P}(\mathcal{B})$  with respect to the weak topology for any Borel spaces  $\mathcal{A}, \mathcal{B}$ . Thus,  $f_{n+1}$  is a composition of two homeomorphisms onto their images, and is therefore a homeomorphism onto its image. □

*Lemma 13: The map  $f_{\infty}$  is a continuous bijection onto its image.*

*Proof.* Let  $\hat{f}_n : \mathcal{P}^n(\mathcal{X}) \rightarrow \mathcal{H}_{\mathcal{I}}\mathcal{P}^\infty(\mathcal{X})$  be the map  $\mu \mapsto [f_n(\mu)]$ . Then the following diagram commutes:

$$\begin{array}{ccc}
 \mathcal{P}^i(\mathcal{X}) & \xrightarrow{\delta^{ij}} & \mathcal{P}^j(\mathcal{X}) \\
 \downarrow \Delta^i & & \downarrow \Delta^j \\
 & \mathcal{P}^\infty(\mathcal{X}) & \\
 \downarrow \hat{f}_i & \downarrow f_\infty & \downarrow \hat{f}_j \\
 & \mathcal{H}_{\mathcal{I}}\mathcal{P}^\infty(\mathcal{X}) & 
 \end{array}$$

Thus,  $f_\infty$  is a continuous bijective map.  $\square$

*Lemma 14:* The map  $g_n \circ (id_n \times f_n) : \mathcal{I}^n \times \mathcal{P}^n(\mathcal{X}) \rightarrow \mathcal{P}^n(\mathcal{X})$  defined by  $(i_1, \dots, i_n, \mu) \mapsto g_n(i_1, \dots, i_n, f_n(\mu))$  is equal to the projection map  $\pi_{n+1} : \mathcal{I}^n \times \mathcal{P}^n(\mathcal{X}) \rightarrow \mathcal{P}^n(\mathcal{X})$  defined by  $\pi_{n+1}(i_1, \dots, i_n, \mu) = \mu$ .

*Proof.* We proceed by induction. For  $n = 0$ , we have  $g_0 \circ (id_0 \times f_0) : \{\cdot\} \times \mathcal{X} \rightarrow \mathcal{X}$  is the identity map (identifying  $\mathcal{I}^0 = \{\cdot\}$  with an arbitrary one-point set, and noting that  $\mathcal{X}$  and  $\{\cdot\} \times \mathcal{X}$  may be identified with each other). Hence,  $g_0 \circ (id_0 \times f_0)(\cdot, x) = x$  for every  $x \in \mathcal{X}$ . Now, suppose that  $g_n \circ (id_n \times f_n) = \pi_{n+1}$ . Let  $E \subseteq \mathcal{P}^n(\mathcal{X})$  be a Borel subset, and suppose  $(i_1, \dots, i_{n+1}) \in \mathcal{I}^{n+1}$  and  $\mu \in \mathcal{P}^{n+1}(\mathcal{X})$ . Then we have the following:

$$\begin{aligned}
 g_{n+1} \circ (id_{n+1} \times f_{n+1})(i_1, \dots, i_{n+1}, \mu)(E) &= g_{n+1}(i_1, \dots, i_{n+1}, f_{n+1}(\mu))(E) \quad (34) \\
 &= push(g_n)(\delta_{i_1} \otimes \dots \otimes \delta_{i_n} \otimes push(f_n)(\mu))(E) \\
 &= (\delta_{i_1} \otimes \dots \otimes \delta_{i_n} \otimes push(f_n)(\mu))(\{(j_1, \dots, j_n, h) \in \mathcal{I}^n \times \mathcal{H}_{\mathcal{I}}\mathcal{P}^n(\mathcal{X}) \mid g_n(j_1, \dots, j_n, h) \in E\}) \\
 &= push(f_n)(\mu)(\{h \in \mathcal{H}_{\mathcal{I}}\mathcal{P}^n(\mathcal{X}) \mid g_n(i_1, \dots, i_n, h) \in E\}) \\
 &= \mu(\{\nu \in \mathcal{P}^n(\mathcal{X}) \mid g_n(i_1, \dots, i_n, f_n(\nu)) \in E\}) \\
 &= \mu(\{\nu \in \mathcal{P}^n(\mathcal{X}) \mid (g_n \circ (id_n \times f_n))(i_1, \dots, i_n, \nu) \in E\}) \\
 &= \mu(\{\nu \in \mathcal{P}^n(\mathcal{X}) \mid \pi_{n+1}(i_1, \dots, i_n, \nu) \in E\}) = \mu(E)
 \end{aligned}$$

$\square$
